# Supplementary material for: Dynamic regulation of the cancer stem cell compartment by Cripto-1 in colorectal cancer
Source: PubMed Central journal article supplement — Cell Death Differ. 2015 Mar 20;22(10):1700–13. doi: 10.1038/cdd.2015.19 (PMC4563784; doi:10.1038/cdd.2015.19), 2015-03-20
Supplement: cdd201519x1.pdf [file cdd201519x1.pdf]

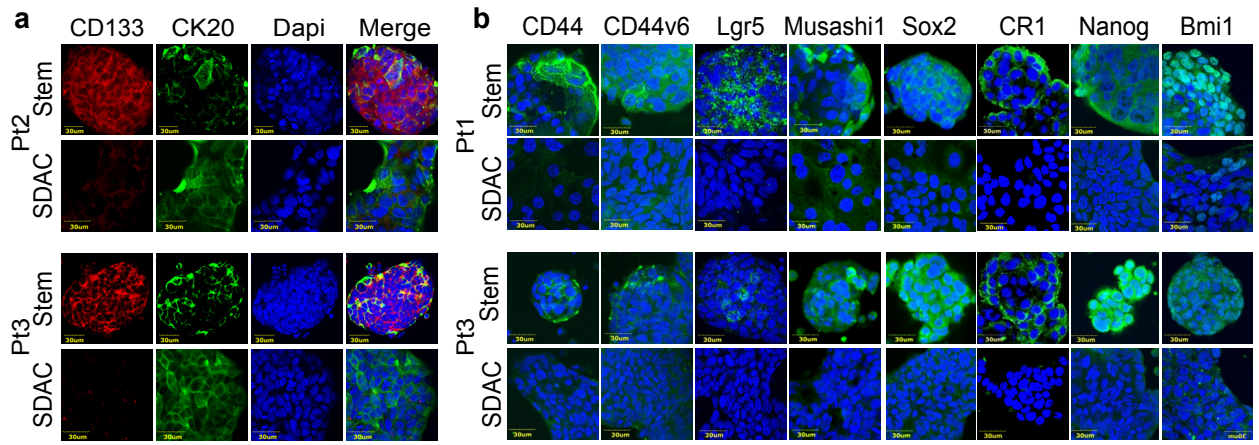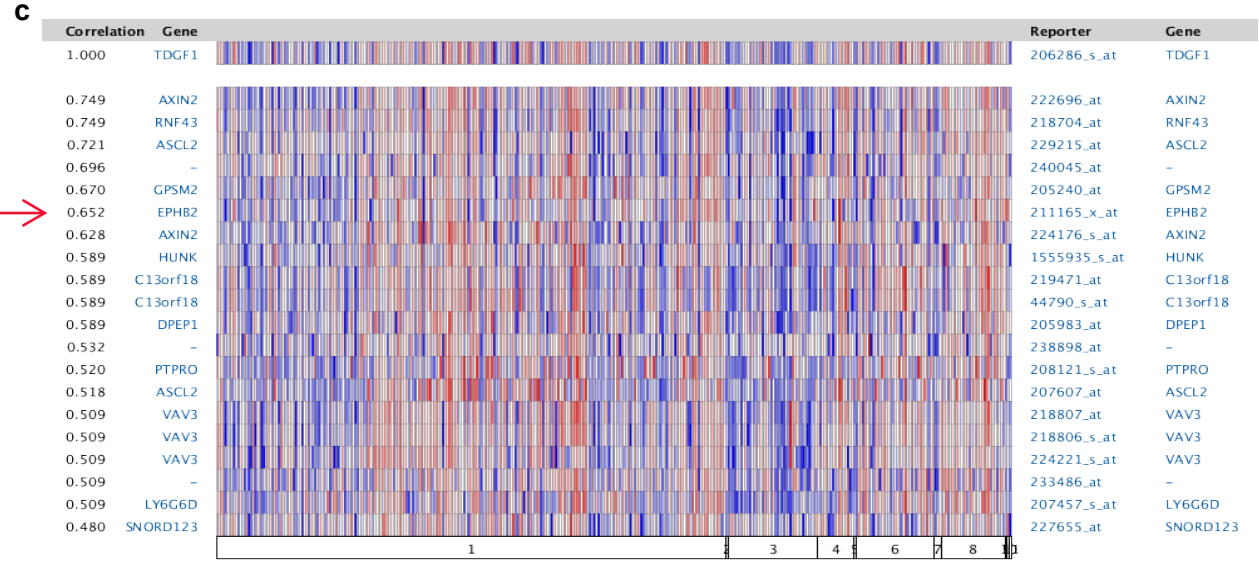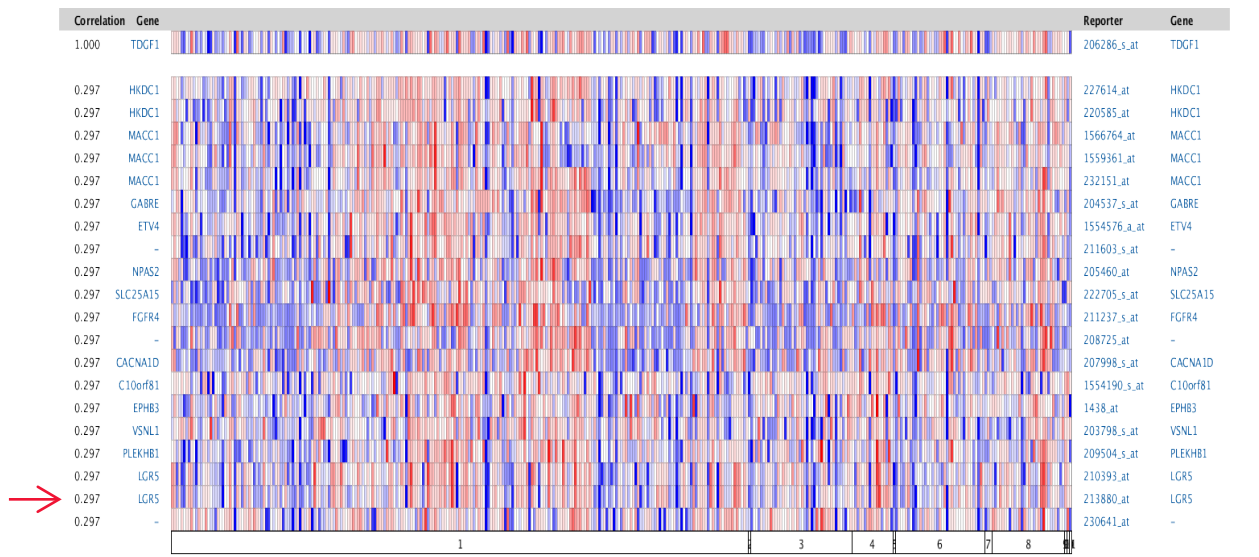

**Legend**

- 1. Colon Adenocarcinoma (239)
- 2. Colon Medullary Carcinoma (1)
- 3. Colon Mucinous Adenocarcinoma (42)
- 4. Colon Villous Adenoma (17)
- 5. Colon Signet Ring Cell Adenocarcinoma (1)
- 6. Rectal Adenocarcinoma (37)
- 7. Rectal Mucinous Adenocarcinoma (3)
- 8. Rectosigmoid Adenocarcinoma (30)
- 9. Stage 0 Colon Cancer (1)
- 10. Stage 0 Colorectal Cancer (1)
- 11. Colon Undifferentiated Carcinoma (1)

Bittner Colon

Not Published 2005/01/15 373 samples  
 mRNA 19,574 measured genes  
 Human Genome U133 Plus 2.0 Array

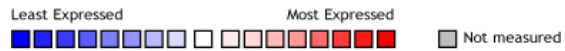

Note: Colors are z score normalized to depict relative values within rows. They cannot be used to compare values between rows

**Supplementary Figure 1, Francescangeli et al.**
