# Supplementary material for: Dynamic regulation of the cancer stem cell compartment by Cripto-1 in colorectal cancer
Source: PubMed Central journal article supplement — Cell Death Differ. 2015 Mar 20;22(10):1700–13. doi: 10.1038/cdd.2015.19 (PMC4563784; doi:10.1038/cdd.2015.19), 2015-03-20
Supplement: cdd201519x5.pdf [file cdd201519x5.pdf]

| <b>Spheroid</b> | <b>Origin</b> | <b>Type</b>    | <b>Dukes</b> | <b>BRAF</b> | <b>KRAS</b> | <b>p53</b> | <b>PI3K</b> |
|-----------------|---------------|----------------|--------------|-------------|-------------|------------|-------------|
| Pt1             | Colon left    | Adenocarcinoma | G2           | wt          | mut         | mut        | wt          |
| Pt2             | Sigma         | Adenocarcinoma | G2/D         | -           | wt          | mut        | wt          |
| Pt3             | Colon right   | Adenocarcinoma | G2/B         | -           | G12V/wt     | wt/fs      | wt          |

**Supplementary Table 1, Francescangeli et al.**
