# Supplementary material for: Dynamic regulation of the cancer stem cell compartment by Cripto-1 in colorectal cancer
Source: PubMed Central journal article supplement — Cell Death Differ. 2015 Mar 20;22(10):1700–13. doi: 10.1038/cdd.2015.19 (PMC4563784; doi:10.1038/cdd.2015.19), 2015-03-20
Supplement: cdd201519x6.pdf [file cdd201519x6.pdf]

|                  | Match region | Hairpin sequence 5'-3'                                    | Target sequence       |
|------------------|--------------|-----------------------------------------------------------|-----------------------|
| Non-Target shRNA | -            | CCGGGCGCGATAGCGCTAATAATTTCTCGAGAAATTATTAGCGCTATCGCGCTTTTT | -                     |
| TRCN000004889    | 3' UTR       | CCGGCTAAATGGAAGGGCAAGTTTCTCGAGAACTTGCCCTTCATTTAGCTTTTT    | GCTAAATGGAAGGGCAAGTTT |
| TRCN000004890    | CDS          | CCGGCCTTCTATACAAAGCTACTACTCGAGTAGTAGCTTTGTATAGAAAGGTTTT   | CCTTCTATACAAAGCTACTA  |

**Supplementary Table 2, Francescangeli et al.**
