# Supplementary material for: Dynamic regulation of the cancer stem cell compartment by Cripto-1 in colorectal cancer
Source: PubMed Central journal article supplement — Cell Death Differ. 2015 Mar 20;22(10):1700–13. doi: 10.1038/cdd.2015.19 (PMC4563784; doi:10.1038/cdd.2015.19), 2015-03-20
Supplement: cdd201519x7.pdf [file cdd201519x7.pdf]

| <b>Primers for Quantitative RT PCR</b> |                      |         |
|----------------------------------------|----------------------|---------|
| <b>CR1</b>                             | ACAGAACCTGCTGCCTGAAT | Forward |
|                                        | ATCACAGCCGGGTAGAAATG | Reverse |
| <b>Nanog</b>                           | CTGTGATTTGTGGCCTGAA  | Forward |
|                                        | TGTTTGCCTTTGGGACTGGT | Reverse |
| <b>Glypican1</b>                       | ATGGCTGTCTGGATGACCTC | Forward |
|                                        | GTCAGTCCTTGGCCTCTGTC | Reverse |
| <b>Nodal</b>                           | CTTCCTGAGCCAACAAGAGG | Forward |
|                                        | AGGTGACCTGGGACAAAGTG | Reverse |
| <b>Alk4</b>                            | TGCAACAGGATCGACTTGAG | Forward |
|                                        | GGAGCGTCTTGTCTTTGGAG | Reverse |
| <b>GRP78</b>                           | ATTGCGACCTTCCTCATCTG | Forward |
|                                        | GAGAGCTGTCATGGGTGGA  | Reverse |
| <b>GAPDH</b>                           | TGGAAGATGGTGATGGGATT | Forward |
|                                        | GAGTCAACGGATTTGGTCGT | Reverse |

**Supplementary Table 3, Francescangeli et al.**
