# Supplementary figures and images for: Dynamic regulation of the cancer stem cell compartment by Cripto-1 in colorectal cancer
Source: PubMed Central journal article supplement — Cell Death Differ. 2015 Mar 20;22(10):1700–13. doi: 10.1038/cdd.2015.19 (PMC4563784; doi:10.1038/cdd.2015.19), 2015-03-20

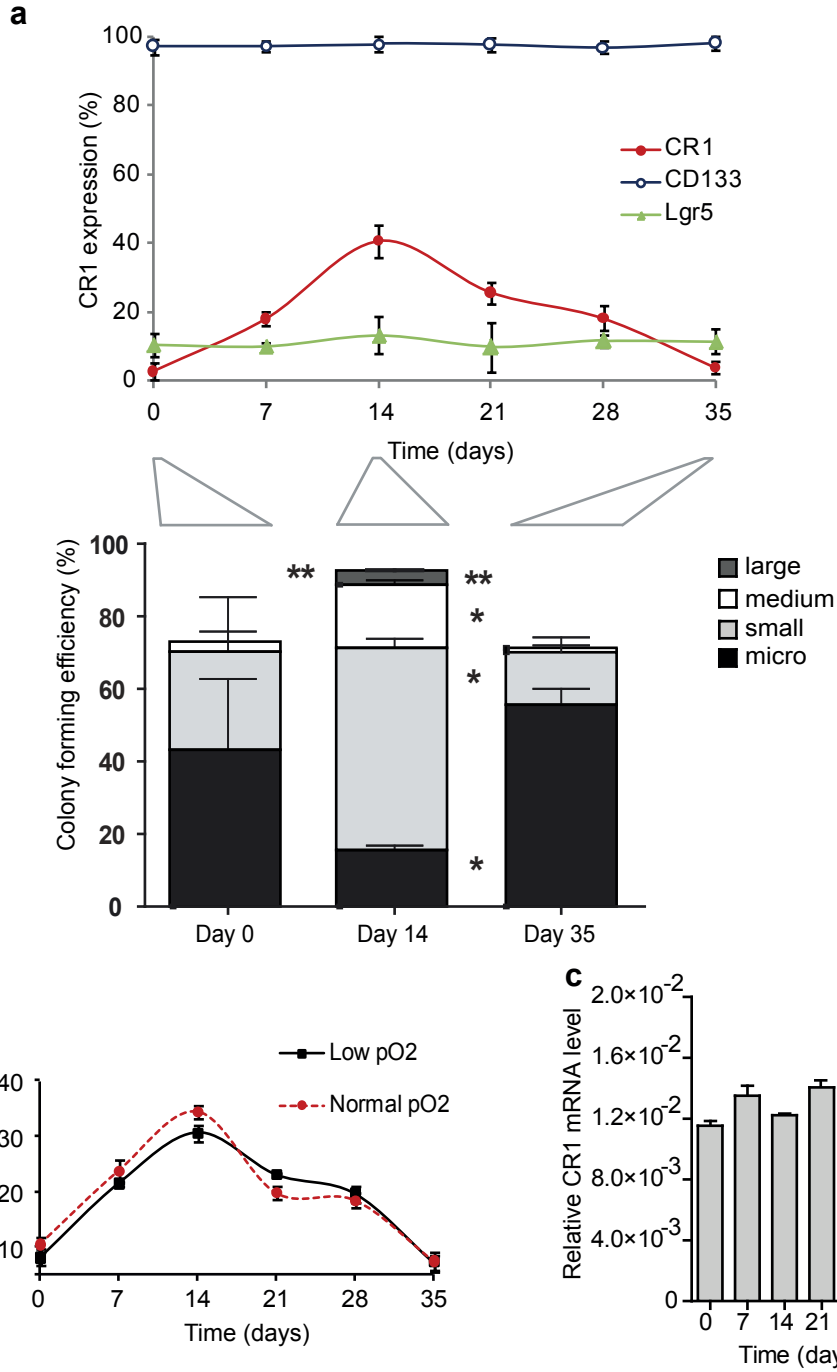

Supplementary Figure 2, Francescangeli et al.

Supplement: cdd201519x2.pdf [file cdd201519x2.pdf]

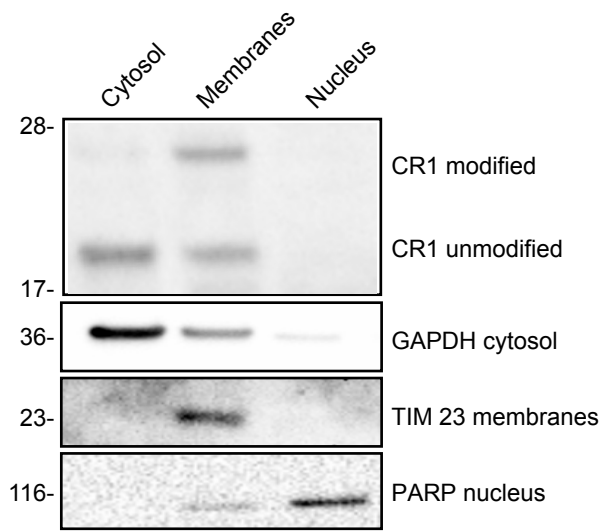

**Supplementary Figure 3, Francescangeli et al.**

Supplement: cdd201519x3.pdf [file cdd201519x3.pdf]

**a**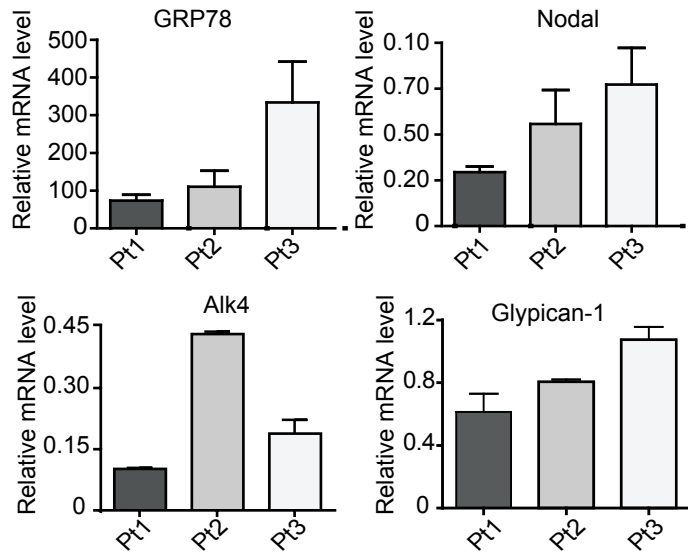**b**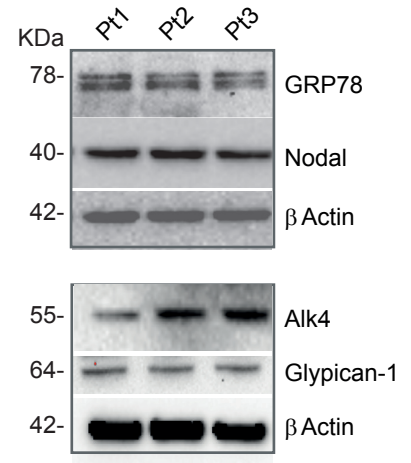

Supplementary Figure 4, Francescangeli et al.

Supplement: cdd201519x4.pdf [file cdd201519x4.pdf]
